# Supplementary material
Source: HighWire-hosted journal article supplement (https://www.annfammed.org/highwire/filestream/8387/field_highwire_adjunct_files/0/Goodyear-Smith_Supp_App.pdf)
Supplement: Goodyear-Smith_Supp_App.pdf [file Goodyear-Smith_Supp_App.pdf]

Online Supplementary Material

Goodyear-Smith F, Warren J, Bojic M, Chong A. eCHAT for lifestyle and mental health screening in primary care. *Ann Fam Med*. 2013;11:460-466.

<http://www.annfammed.org/content/11/5/460>

Supplemental Appendix: Patient Feedback

Department of General Practice and Primary Health Care

School of Population Health

Prof Felicity Goodyear-Smith

MB ChB FRNZCGP MGP

Telephone: 64 9 923 2357

Mobile 021 897 244

Facsimile: 64 9 3737624

Email: [f.goodyear-smith@auckland.ac.nz](mailto:f.goodyear-smith@auckland.ac.nz)

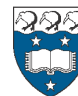

THE UNIVERSITY OF AUCKLAND  
FACULTY OF MEDICAL AND  
HEALTH SCIENCES

The University of Auckland

Private Bag 92019

Auckland

New Zealand

[www.health.auckland.ac.nz](http://www.health.auckland.ac.nz)

Feasibility and acceptability of implementing the revised version of the electronic  
Case-finding and Help Assessment Tool (eCHAT)

**Patient feedback on eCHAT**

What (if anything) do you like about the questionnaire on the iPad?

Is there anything you think could be improved?

Did you find the iPad easy to use?  No  Yes

If no, what might make it easier?

Did you find all the questions clearly phrased and easy to understand?  No  Yes

If no, what (as well as you can recall) was the problem?

Do you think that this is an appropriate thing for your GP to be offering?  No  Yes

If No, why not? If Yes, why?

Are there any questions you object to being asked?  No  Yes

If Yes, which ones?

Tobacco  Alcohol  Other Drugs  Gambling  Depression  Anxiety  
 Abuse/ violence  Anger  Exercise

Did you have any concerns about privacy with the process?  No  Yes

If yes, how might this be improved?

Did the GP have access to your responses during the consultation?  No  Yes

Did you discuss any of your responses on the iPad during your consultation with your GP?  No  Yes

If yes, did you find this helpful?  No  Yes

Do you think this could improve the time spent with your doctor?  No  Yes

Do you think this could reduce the time spent with your doctor?  No  Yes

Did you have any other comments or suggestions?
